1 **Title**

2 **Slow and fast cortical dynamics distinguish motor planning and execution**

3

4 **Authors**

5 David Eriksson\*, Mona Heiland, Artur Schneider, and Ilka Diester\*

6 David Eriksson\*

7 Optophysiology

8 University of Freiburg

9 Faculty of Biology

10 79104 Freiburg

11 Germany

12

13 Mona Heiland

14 Optophysiology

15 University of Freiburg

16 Faculty of Biology

17 79104 Freiburg

18 Germany

19 Current address:

20 Department of Physiology and Medical Physics

21 Royal College of Surgeons in Ireland | RCSI

22 123 St. Stephen's Green

23 Dublin 2

24 Ireland

25

26 Artur Schneider

27 Optophysiology

28 University of Freiburg  
29 Faculty of Biology  
30 79104 Freiburg  
31 Germany  
32  
33 Ilka Diester\*  
34 Optophysiology  
35 University of Freiburg  
36 Faculty of Biology  
37 BrainLinks-BrainTools  
38 Bernstein Center Freiburg  
39 79104 Freiburg  
40 Germany  
41  
42 \* Corresponding author (s)

## 43 **Summary**

44 The smooth conduction of movements requires simultaneous motor planning and execution according  
45 to internal goals. So far it is not known how such movement plans can be modified without being  
46 distorted by ongoing movements. Previous studies have isolated planning and execution related  
47 neuronal activity by separating behavioral planning and movement periods in time by sensory cues<sup>1-7</sup>.  
48 Here, we introduced two novel tasks in which motor planning developed intrinsically. We separated  
49 this continuous self-paced motor planning statistically from motor execution by experimentally  
50 minimizing the repetitiveness of the movements. Thereby, we found that in the rat sensorimotor  
51 cortex, neuronal motor planning processes evolved with slower dynamics than movement related  
52 responses both on a sorted unit and population level. The fast evolving neuronal activity preceded  
53 skilled forelimb movements while it coincided with movements in a locomotor task. We captured this  
54 fast evolving movement related activity via a high-pass filter approach. As biological mechanism  
55 underlying such a high pass filtering we suggest neuronal adaption. The differences in dynamics  
56 combined with a high pass filtering mechanism represents a simple principle for concurrent motor  
57 planning and execution in which planning will result in relatively slow dynamics that will not produce  
58 movements.

59

## 60 **Main Text**

61 In smooth movement sequences, a continuum from motor planning over motor execution to sensory  
62 integration can be defined, according to the temporal lag between neuronal activity and behavior.  
63 Here, we consider neuronal activity with a temporal lag to the behavior in the order of a previously  
64 suggested range of less than 100 ms<sup>8,9</sup> as being related to motor execution. We refer to neuronal  
65 activity with larger temporal lags to the behavior as motor planning or sensory integration, depending  
66 on whether the neuronal activity occurred before or after the movement. This lag based interpretation  
67 of neuronal processes is hampered by behavioral correlations. If two behavioral processes are

68 correlated (e.g. because they always occur in the same sequence), neuronal activities appear to be  
69 correlated to both even if a causal relationship only exists for one of the behavioral processes. To  
70 reduce this temporal bleeding, we aimed to minimize correlations by encouraging animals to conduct  
71 movements with minimal reoccurrence of individual movement sequences. In the locomotor task, rats  
72 moved unconstrained in a box while searching for pseudo-randomly placed water drops on a floor  
73 mesh (**Fig. 1A**). In the joystick task, rats were trained to move a joystick with their right front paw while  
74 minimizing revisiting previously visited positions (**Fig. 1B**). Thus, rats had to internally develop  
75 movement plans to optimize the number of rewards. In both tasks, movements were not repetitive as  
76 indicated by the narrow temporal behavioral autocorrelations of the movement velocities (see data  
77 boxes in **Fig. 1C and D**). A repetitive movement or prolonged behavioral state would cause an  
78 autocorrelation with multiple peaks (see illustration in **Fig. 1C**) or one broader peak due to  
79 experimentally induced delay periods which can lead to an extended neuronal activity often  
80 interpreted as motor planning (see illustration in **Fig. 1D**), respectively.

81 To study the neuronal underpinnings of decorrelated movements, we trained six Long-Evans rats in  
82 the locomotor task. Five of these animals were also trained in the joystick task. To record neuronal  
83 activity, electrodes were placed bilaterally in the sensorimotor cortex (42 electrodes per animal,  
84 **Fig. 1E**). We targeted the output layer V by implanting the electrodes at a depth of 1.2 mm<sup>10,11</sup>. In total  
85 we recorded 5400 single units (SU) and 6876 multi units (MU) over 100 sessions for the locomotor task  
86 (**Supplementary Table 1**) and 1217 SU and 1659 MU over 25 sessions for the joystick task  
87 (**Supplementary Table 2**). We refer to SU and MU collectively as sorted units. For repetitive behavior,  
88 neurons may fire at a specific lag relative to each other, rendering some lags less represented than  
89 others. This causes the firing rate for some lags to be fundamentally lower than the average firing rate  
90 (see dashed lines in **Fig. 1C and D**). Here, the neuronal activity was characterized by a decorrelated  
91 pair-wise spiking, i.e. pairs of neurons fired independently of each other such that all lags were  
92 represented equally, and the firing rate at a certain lag was close to the average firing rate. The firing  
93 rate of one neuron relative to another neuron at the least represented lag was  $94 \pm 13\%$  and  $88 \pm 12\%$

94 of the average firing rate in the locomotor and joystick task, respectively (**Fig. 1C and D**, see methods)  
95 indicating a decorrelated neuronal activity. Because both the behavioral and the neuronal activity were  
96 decorrelated with respect to time, the temporal bleeding was minimized and the temporal precision  
97 of the estimated functional relation between movement and neuronal activity was optimized. To  
98 quantify the temporal precision, we calculated the range of temporal lags for which a given sorted unit  
99 was modulated by the paw velocity (**Fig. 1F and G**). We refer to this modulation across lags as velocity  
100 modulation and the duration for which the velocity modulation exceeded 80% of the peak modulation  
101 we refer to as the modulation duration. We observed units with both long modulation durations  
102 (locomotor task:  $1.6 \pm 0.37$ s, joystick task:  $1.2 \pm 0.37$ s) and short modulation durations (locomotor task:  
103  $0.36 \pm 0.09$ s, joystick task:  $0.27 \pm 0.06$ s) within the same session (**Fig. 1H and I**). This demonstrates that  
104 our approach minimized behavioral bleeding to the extent which allowed separating long processes,  
105 like motor planning and sensory integration, from shorter processes like motor execution. Finally, this  
106 behavioral approach enabled us to quantify the relative strength of motor planning and sensory  
107 integration by taking the normalized difference of the velocity modulation for negative and positive  
108 temporal lags. In line with previous lesion and inactivation approaches<sup>12-15</sup>, the relative contribution  
109 of the motor planning related activity was larger for the joystick task ( $9.3 \pm 2.8\%$ , mean  $\pm$  SEM,  
110  $p=0.0007$ , two-tailed t-tests) whereas the sensory integration related activity was larger in the  
111 locomotor task ( $-4.3 \pm 1\%$ , mean  $\pm$  SEM,  $p<0.0001$ , two-tailed t-tests, **Fig. 1J**). Thus, our approach  
112 based on minimal repetitive movements complements previous studies with a temporally refined  
113 neuronal activity based assay of the gradient from motor planning and execution to sensory integration  
114 for skilled and locomotor behavior.

115

#### 116 *Varying neuronal modulation durations*

117 Motor execution can be generated by sequentially activated sets of neurons, or similarly, a sensory  
118 event may traverse through the network. A temporal recruitment of neurons has been described for

119 attractor networks<sup>16,17</sup>. Those studies focused on a special case in which each neuron was activated for  
120 a constant duration (**Fig. 2A, upper panel**). Alternatively, the modulation duration may increase with  
121 larger temporal lags relative to the movement (**Fig. 2A, lower panel**). Here we defined the temporal  
122 lag based on the peak of the velocity modulation (see methods). In accordance with the second  
123 hypothesis, the modulation duration increased significantly with increasing temporal lags for both  
124 locomotor and joystick tasks (ANOVA, locomotor task,  $p < 0.0001$ , ANOVA joystick task,  $p < 0.0001$ ,  
125 **Fig. 2B and C**). This suggests that putative motor execution represented by units with shorter temporal  
126 lags occurred with faster neural dynamics than motor planning and sensory integration.

127

#### 128 *Integration timing of cortical areas*

129 If motor planning and sensory integration is associated with longer modulation durations, it is  
130 conceivable that a higher brain area, such as secondary motor cortex (M2, putatively functionally  
131 similar to premotor cortex in primates<sup>18,19</sup>) contains neurons with longer modulation durations than  
132 primary motor cortex (M1). To test this, we mapped the electrode locations on to the non-linear  
133 gradient spanning M2, M1, and primary somatosensory cortex (S1) (**Fig. 1E**). Indeed, neurons in higher  
134 areas (i.e., M2) had a significantly longer modulation duration than neurons in lower areas (i.e., M1  
135 and S1, **Fig. 2D**). This was true for both the locomotor and the joystick task (ANOVA, locomotor task:  
136  $p < 0.0001$ , joystick task:  $p < 0.0001$ ). On average, neurons in S1, M1, and M2 had a modulation duration  
137 of  $507 \pm 14$ ,  $555 \pm 13$  and  $676 \pm 22$  ms during locomotor and  $369 \pm 29$ ,  $423 \pm 27$ , and  $469 \pm 38$  ms  
138 (mean  $\pm$  SEM) during the joystick task.

139

#### 140 *Population activity destabilizes during movement*

141 Next, we examined whether the differences between the two tasks regarding the modulation duration  
142 of individual units also generalized to the neuronal population. To this end, we correlated the  
143 population activity, including all sorted units at any two time points. We refer to this correlation as

144 population correlation. The population correlation will typically decay with increasing temporal  
145 distance between the two time points. This population correlation decay is a measure for the stability  
146 of the population activity, i.e. how slow (stable over time) or fast (instable over time) the population  
147 activity changes. To compare the stability of the population activity during movement and behavioral  
148 quiescence, we defined trials between the time point of lowest paw velocity (peri-trial time of -  
149 1 second) which we refer to as premovement and the time point of highest paw velocity (peri-trial  
150 time +1 second) which we refer to as movement (see methods, **Fig. 3A and B**). While the population  
151 correlation followed a similar motive with a less confined diagonal during premovement and a more  
152 confined diagonal during movement, robust bands of low correlation during movement execution only  
153 occurred in the joystick task, but not in the locomotor task, thus revealing a qualitatively different  
154 correlation structure (**Fig. 3C and D**). These bands of low correlation are a sign of a quick decay of the  
155 population correlation, indicating that the population activity changed rapidly during motor execution.  
156 To quantify how fast the population correlation decayed, we fit an exponential function to the decay  
157 of the population correlation. During periods of movements, population correlations decayed  
158 significantly faster than the median time constant in the joystick task ( $-176 \pm 59$  ms, mean  $\pm$  SEM,  $n=5$ ,  
159  $p=0.043$ , two-tailed t-tests) but not in the locomotor task ( $-18 \pm 27$  ms, mean  $\pm$  SEM,  $n=6$ ,  $p=0.54$ , two-  
160 tailed t-tests, **Fig. 3E and F**). In line with the strong decrease in time constant in the joystick task during  
161 movements (**Fig. 3G**), the time constant during joystick movements was lowest ( $203 \pm 88$  ms,  
162 mean  $\pm$  SEM,  $n=5$ , **Fig. 3H**) indicating an unstable population activity. In contrast, the time constant  
163 was largest (i.e. the population activity was stable) during joystick premovement periods which  
164 putatively involves motor planning ( $761 \pm 375$  ms, mean  $\pm$  SEM,  $n=5$ , **Fig. 3H**). The difference in stability  
165 of the population activity cannot be explained by behavioral differences across the two tasks  
166 (summarized in Supplementary Note 1). To summarize, this suggests that premovement periods  
167 (putatively involving motor planning) were associated with stable population activity with slow  
168 changes in the neuronal activity whereas movements (referring to motor execution) were associated  
169 with unstable population activity with fast changes in the neuronal activity.

170 *Fast neuronal activity precedes movement*

171 Unstable population activities associated with motor execution could be captured in the high  
172 frequency range. Thus, a high-pass filtered neuronal activity should be tightly correlated to movement  
173 execution (**Fig. 4A**). Paw velocities provide a general measure of movement magnitude independent  
174 of specific types of movements. To allow a comparison of the discretized and typically low frequency  
175 spike trains of sensorimotor cortex with the continuous paw movements, we reconstructed the  
176 continuous subthreshold activity with a resolution of 10 ms from the spiking activity<sup>20</sup> (**Fig. 4B**). This  
177 allows the detection of neuronal activity changes which are faster than those signaled by low  
178 frequency spiking events. Fast changing activities typically preceded large paw velocities (**Fig. 4C**). To  
179 quantify this relation, we calculated the Pearson correlation coefficient between paw velocity and the  
180 absolute high pass filtered neuronal activity (averaged across neurons, cut off frequency 1.1 Hz)  
181 (**Fig. 4D**, upper panels). This was contrasted against corresponding calculations for the low pass filtered  
182 neuronal activity (**Fig 4D**, lower panels). The correlation was generally higher for the high pass filtered  
183 neuronal activity than for the low pass filtered neuronal activity both for the locomotor task (low pass:  
184  $0.059 \pm 0.029$  vs. high pass:  $0.17 \pm 0.025$ , mean  $\pm$  SEM,  $n=6$ ,  $p=0.0163$ , two-tailed t-tests, **Fig 4D and E**),  
185 and for the joystick task (low pass:  $0.1 \pm 0.025$  vs. high pass:  $0.20 \pm 0.013$ , mean  $\pm$  SEM,  $n=5$ ,  $p=0.0091$ ,  
186 two-tailed t-tests). For the joystick task, the correlation reached its maximum at a small negative lag  
187 between high pass filtered neuronal activity and movement, which falls in the range of movement  
188 execution ( $-94 \pm 20$  ms, mean  $\pm$  SEM,  $p = 0.01$ ,  $n = 5$ , two-tailed t-tests, **Fig 4D and F**), whereas the peak  
189 for the locomotor task did not significantly precede the movement for any frequency band ( $120 \pm 110$   
190 ms, mean  $\pm$  SEM,  $p = 0.33$ ,  $n = 6$ , two-tailed t-tests). The lag of the peak of the correlation was  
191 significantly shifted to positive values corresponding to sensory integration for the low-pass filtered  
192 neuronal activity in the locomotor task ( $770 \pm 117$  ms, mean  $\pm$  SEM,  $p = 0.0013$ ,  $n = 6$ , two-tailed t-tests),  
193 and to negative values corresponding to motor planning components in the joystick task ( $-234 \pm 36$  ms,  
194 mean  $\pm$  SEM,  $p = 0.0029$ ,  $n = 5$ , two-tailed t-tests). Thus the frequency of the neuronal activity  
195 separated planning and sensory integration from motor execution.



## 196 Discussion

197 Based on two tasks that encouraged animals to conduct minimally repetitive movements, we found  
198 that fast changes in neuronal activity were related to motor execution. These fast changes in neuronal  
199 activity were more pronounced during the joystick task than during the locomotor task. Furthermore,  
200 higher frequencies in the neuronal activity preceded the movement by 100 ms in the joystick task,  
201 whereas it coincided with the movement for the locomotor task. This is in line with the fact that the  
202 locomotor task required no training (**Fig S1A**) and that locomotion may be dominated by an efference  
203 copy signal in the neuronal activity<sup>15,21</sup>. In contrast, the joystick task required training (**Fig S1B**) and  
204 lesioning and inactivation studies have shown that skilled movements are more dependent on the  
205 motor cortex<sup>12-14</sup>. Here we showed that lower frequencies were decoupled from movement suggesting  
206 that they were more related to motor planning and sensory integration. Movement decoupled activity  
207 avoided the high frequencies underlining the general role of the fast changing neuronal activities in  
208 motor cortex for movement execution. Such a fast changing population activity can be extracted by a  
209 classic high pass filter. Fast changes refer to e.g. changes from a high firing rate to a low firing rate, or  
210 vice versa. Adaptation mechanisms<sup>22-26</sup> at any stage between the cortex and the muscles could serve  
211 as the biological equivalent of such a high pass filter (see Supplementary Note 2).

212 The here proposed frequency based separation of motor planning and execution can be integrated  
213 into conceptual frame works of motor control. According to the concept of dynamical systems, e.g. the  
214 null-space theory<sup>3</sup>, the frequency based separation of motor planning and execution would allow both  
215 processes to work in parallel. So far the null-space theory was tested with trial structures with  
216 temporally separated planning and execution periods<sup>6</sup> or with sensory driven motor execution<sup>27</sup>. For  
217 intrinsically planned continuous movements, our results suggest that two independent population  
218 state spaces can be generated in the frequency domain, one based on high and one on low frequencies.  
219 The concept of separate neuronal populations for motor execution and motor planning (e.g. by  
220 genetically or projection defined neurons<sup>1,2</sup>) assumes a complete separation of the signals. However,  
221 genetically defined spinal cord projecting neurons have been shown to not only encode motor

222 execution but also motor planning<sup>2,7</sup>. Our proposed high-pass filtering mechanism could be a way to  
223 expose the motor execution component by decreasing the planning component. Therefore, the  
224 separation of the processes by means of slow and fast dynamics could facilitate simultaneous parallel  
225 motor planning and execution within the same neuron, be it in the conceptual frame work of dynamical  
226 systems or based on identified neuronal subtypes.

227 The separation of motor planning and execution by means of different frequencies of neuronal activity  
228 requires that motor planning evolves relatively slowly. This prerequisite is reasonable, as planning and  
229 decision making rely on accumulating internal or external evidence<sup>28-30</sup>. Thus, motor planning-related  
230 neuronal activity changes slowly and hence can be stopped from percolating to the muscles by a high  
231 pass filtering mechanism based on neuronal adaptation. Thus, our proposed mechanisms is able to  
232 explain in a very simple manner the simultaneous implementation of intrinsic motor planning and  
233 execution.

234 **Figures**

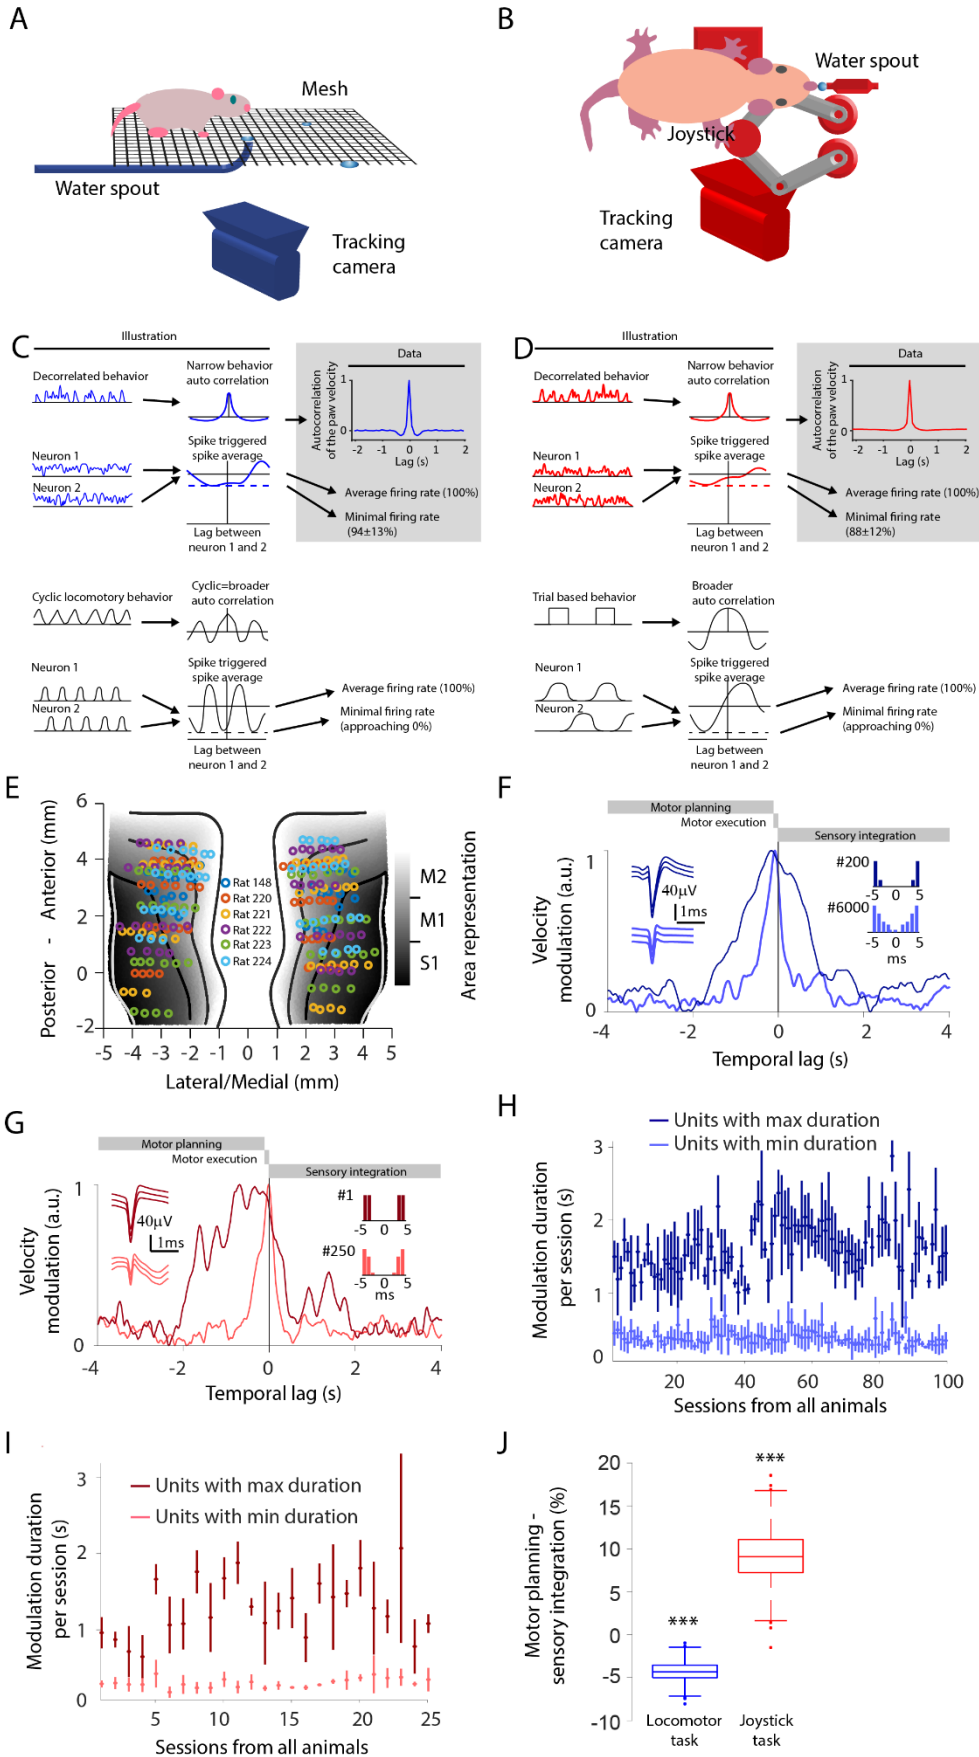

235

236 **Figure 1.** Studying neuronal dynamics with minimally repetitive behavior. A: Setup of locomotor task.  
237 B: Setup of joystick task. C: Illustration of the difference between decorrelated and repetitive behavior  
238 in terms of the behavioral autocorrelation and neuronal cross correlation for the locomotor task. The  
239 behavioral autocorrelation is broader for a repetitive locomotion (bottom panels) than for a  
240 decorrelated behavior (top panels). The minimal value (dashed line) of the neuronal cross correlation  
241 is low if there are lags for which the two neurons do not spike (indicating correlated firing) and it is  
242 high if the two neurons fire at different lags (indicating de-correlated firing) (illustration in left panel).  
243 Autocorrelation for the velocity of the right front paw during the locomotor task (gray data panel).  
244 D: Same outline as in C but for the joystick task. A repeating trial structure causes correlations between  
245 different trial periods. This in turn may increase the width of the behavioral autocorrelation as well as  
246 the correlation between neurons. E: Electrode locations on the sensorimotor cortex for respective  
247 animal. F: Velocity modulation of the instantaneous firing rate for 2 example units with action potential  
248 waveforms (left inset) and interspike interval histogram (right insets) in the locomotor task. Neuronal  
249 firing rates modulated by future or past paw movement velocities are assigned to negative temporal  
250 lags (referring to planning) or to positive temporal lags (referring to sensory integration), respectively.  
251 Lags between 0 and 100ms are considered to be related to motor execution. The dark-blue unit has a  
252 broad velocity modulation, whereas the light-blue unit is temporally very precise. Both units originate  
253 from the same recording session. G: Same outline as in F but for two different units in the joystick task.  
254 The dark-red unit has a broad velocity modulation, while the light-red unit is temporally precise. H: The  
255 unit with the minimal (bright-blue) and maximal (dark-blue) duration of the velocity modulation for  
256 each locomotor session. The error bars denote the standard deviation of bootstrapped durations.  
257 I: Same outline as in H but for the joystick task. Light-red and dark-red corresponds to units with  
258 minimal and maximal modulation duration respectively. J: The summed velocity modulation for motor  
259 planning-related activity (negative lags from -1.1 to -0.1 s) minus the summed velocity modulation for  
260 sensory integration related activity (positive lags from 0 to 1 s). Significances are indicated according  
261 to: \*\*\*  $p < 0.001$ .

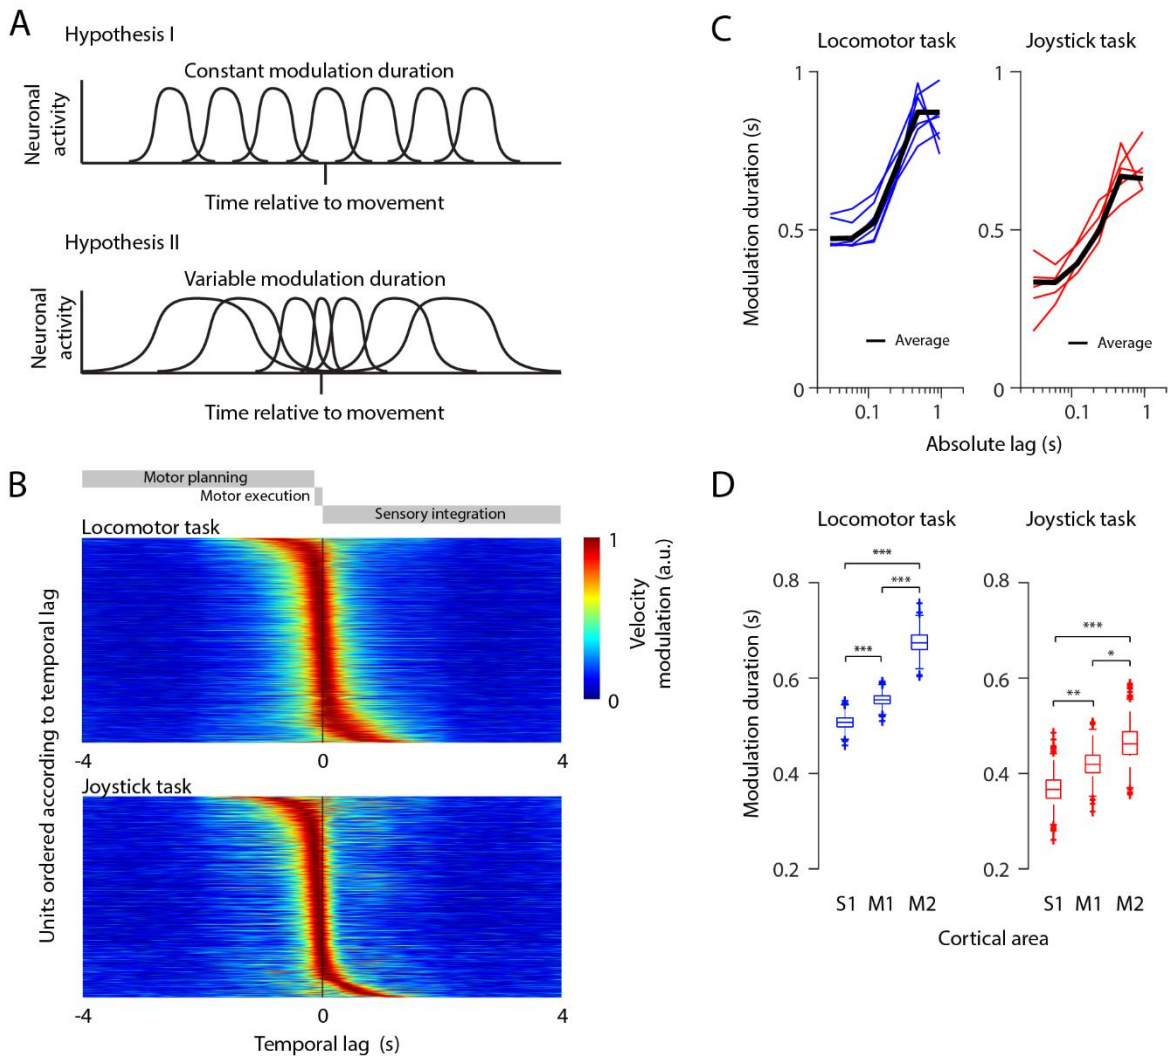

262

263 **Figure 2.** The duration of velocity modulation of individual units depends on the temporal lag to  
 264 behavior and on the cortical area. A: Two hypotheses of sequential neuronal activity relative to  
 265 movement. The duration of the neuronal activity can be constant across lags (upper panel) or different  
 266 across lags (lower panel). B: Units sorted according to the lag of their maximum velocity modulation in  
 267 the locomotor task (top), and for the joystick task (bottom). C: Relation between average modulation  
 268 duration and temporal lag (black line), across the different animals (colored lines) for the locomotor  
 269 (left) and joystick task (right). D: Duration of the velocity modulation for each cortical area for the  
 270 locomotor task (left) and the joystick task (right). Significances are indicated according to: \*  $p < 0.05$ ,  
 271 \*\*  $p < 0.01$ , and \*\*\*  $p < 0.001$ .

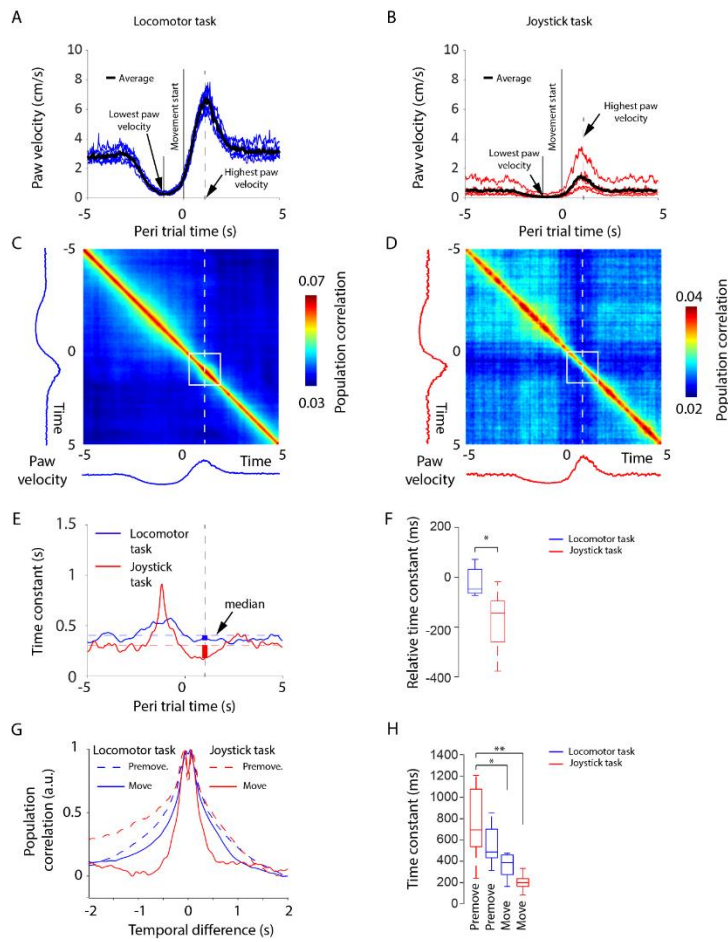

272

273 **Figure 3.** The population activity changes faster during motor execution in the joystick task as  
 274 compared to the locomotor task. A: Average paw velocity across behavioral trials for the locomotor  
 275 task (see methods for the trial definition). Blue lines denote data from individual animals and the black  
 276 line denotes the average across all animals. B: Same outline as in A but for the joystick task. C: Average  
 277 pairwise correlations of population vectors across all animals for the locomotor task. D: Same outline  
 278 as in C but for the joystick task. E: The time constant of the decay in the population correlation across  
 279 the trial in the locomotor task (blue) and the joystick task (red). The median relative time constants  
 280 are included as dotted lines. F: The decrease in time constant during movement in relation to the  
 281 median time constant across the trial for locomotor and joystick task. G: Decay in population  
 282 correlation at the pre-movement time point (at -1 second during lowest paw velocities) and at the  
 283 movement time point (at 1 second during highest paw velocities). H: Time constants for the locomotor  
 284 and joystick task for the pre-movement and movement time points based on the curves in G.  
 285 Significances are indicated according to: \*  $p < 0.05$ , \*\*  $p < 0.01$ .

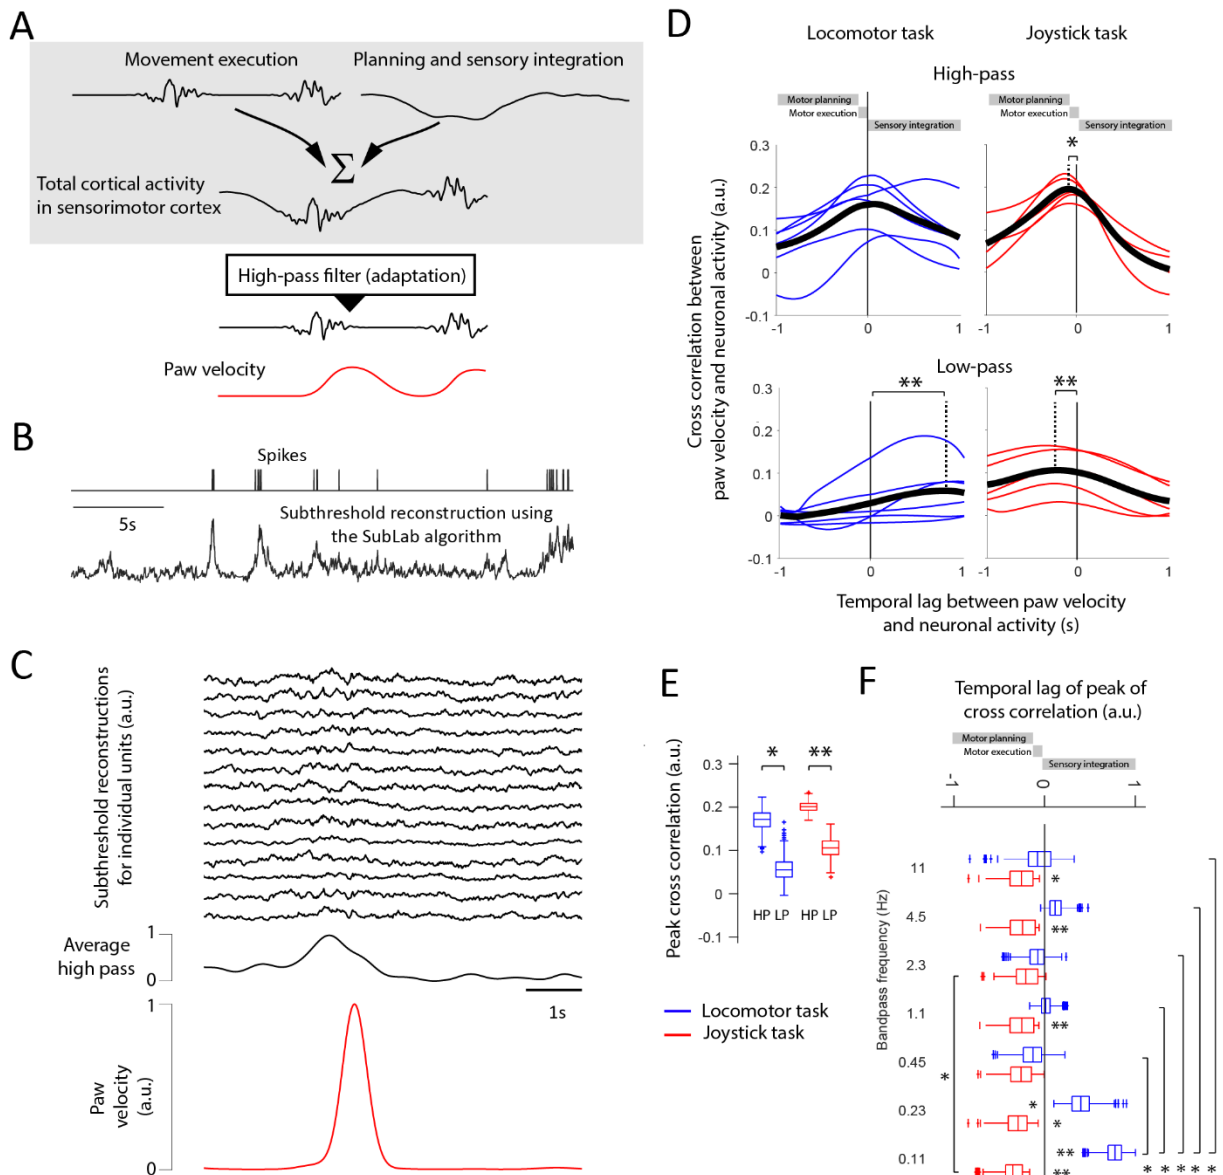

286

287 **Figure 4.** High-pass filtered neural activity is correlated to paw velocities. A: Schematic illustration of  
 288 how a high-frequency neuronal activity can be superimposed on a low-frequency neuronal activity and  
 289 yet be separable. B: To be able to study how fast neuronal activities change, we reconstructed the  
 290 subthreshold activity of the sorted units. C: Reconstruction of neuronal activities from 14 randomly  
 291 selected units during the joystick task (top). An increase in the average absolute high pass filtered  
 292 neuronal activity (black trace, middle row) typically precedes higher paw velocity (red trace). D: The  
 293 Pearson correlation coefficient for different lags between high-pass filtered neuronal activity and the  
 294 paw velocity during the locomotor task (upper-left), and the joystick task (upper right), and for the

295 low-pass filtered neuronal activity and the behavior during the locomotor task (lower left), and the  
296 joystick task (lower right). The comparison between cross-correlation values at time point zero and the  
297 time point of maximal cross-correlation reveals significant changes with different temporal lags. E:  
298 Peak Pearson correlation coefficients for panel D. F: Temporal lags of the peak Pearson correlation  
299 coefficient (across temporal lags) for band-pass filtered neuronal activity. Significances are indicated  
300 according to: \*  $p < 0.05$ , \*\*  $p < 0.01$ .

## 301 **Methods**

### 302 **Animals**

303 All animal procedures were approved by the Regierungspräsidium Freiburg, Germany. In this study we  
304 used six male Long Evans rats (400 g, Janvier) which were implanted at the age of eight weeks and  
305 recorded up to four months after the implantation. Three to four animals were pair-housed in type 4  
306 cages (1500U, IVC typ4, Tecniplast, Hohenpeißenberg, Germany) before implantation and the animals  
307 were single housed after the implantation in type 3 cages (1291H, IVC typ4, Tecniplast,  
308 Hohenpeißenberg, Germany) under a 12 h light dark cycle (dark period from 8 a.m. to 8 p.m., time  
309 span of training and experiments). Prior to the first behavioral training, no behavioral tests were  
310 conducted, no drugs were applied and food (standard lab chow) and water were provided *ad libitum*.  
311 During the course of the experiment, the animals were maintained with free access to food but water  
312 supply was restricted. Rats were kept at > 80 % body weight as measured prior to water restriction.  
313 For 2 days per week, free access to water was ensured.

314

### 315 **Animal surgery**

316 Animals were initially anesthetized with isoflurane inhalation followed by intra-peritoneal injection of  
317 75 mg/kg Ketamine (Medistar, Holzwickede, Germany) and 50  $\mu$ g/kg Medetomidin (Orion Pharma,  
318 Espoo, Finland). The animals were then put into a transportation container covered with an opaque  
319 cloth to facilitate the anesthesia. Once the animals were anesthetized, they were positioned in a



320 stereotaxic frame (David Kopf Instruments, Tujunga, CA, USA) and their body temperature was kept at  
321 36 °C using a rectal thermometer and a heated blanket (FHC, Bowdoin, USA). The anesthesia of the  
322 animals was maintained with approximately 2% isoflurane and 0.5 l/min O<sub>2</sub>. For pre-surgery analgesia,  
323 we subcutaneously (s.c.) administered 0.05 mg/kg Buprenorphine (Selectavet Dr. Otto Fischer GmbH,  
324 Weyarn/Holzolling, Germany). Every other hour, the animals received a s.c. injection of 5 mL isotonic  
325 saline. Moisturizing ointment was applied to the eyes to prevent them from drying out (Bepanthen,  
326 Bayer HealthCare, Leverkusen, Germany). The skin was disinfected with Braunol (B. Braun Melsungen  
327 AG, Melsungen, Germany) and Kodan (Schülke, Norderstedt, Germany). To perform the craniotomy,  
328 the skin on the head was opened along a 2 cm long incision using a scalpel. The exposed bone was  
329 cleaned using a 3% peroxide solution. Self-tapping skull screws (J.I. Morris Company, Southbridge, MA,  
330 USA) for reference for extracellular recordings were placed over cerebellum. Craniotomies were drilled  
331 bilaterally extending from -2 to +5 mm in the anterior posterior direction and from +1 to +4 mm in the  
332 lateral medial direction relative to Bregma. 22 tungsten electrodes (200 to 600 kOhm impedance,  
333 polyimide insulation, WHS Sondermetalle, Grünsfeld, Germany) were implanted at a depth of 1.2 mm  
334 in each hemisphere. Electrodes were implanted according to the area borders given by the online brain  
335 atlas from Matt Gaidica<sup>31</sup> (**Fig. 1E**). Three rows of 6 electrodes each, oriented in the medial-lateral  
336 direction, were implanted in the anterior-posterior direction. The fourth and last row consisted of 4  
337 electrodes, oriented in the medial-lateral direction (see **Fig. 1E**). Occasionally, we had to cut some  
338 electrode wires, in order to not destroy blood vessels at the implantation site (e.g., rat 221, left  
339 hemisphere, last electrode row). Kwik-Cast (WPI, Sarasota, FL, USA) was used to protect the brain from  
340 the dental cement applied in the final step. Before, Mill-Max connectors (Mill-Max, Oyster Bay, USA)  
341 from each hemisphere were glued together to form a 4 x 13 pin connection matrix. The last and first  
342 four pins were connected to the two skull screws over cerebellum to serve as reference and ground.  
343 Finally, the assembly was fixed using dental cement (Paladur, Kulzer GmbH, Hanau, Germany).

344

345 **Behavioral tasks**

346 Animals were encouraged to move with as little repetition as possible. In the locomotor task, two servo  
347 motors positioned a waterspout at different locations within an arena of 30×40 cm. Every 10 to 30 s a  
348 valve ejected a drop of water, which remained in the mesh until the rats consumed it. To prevent the  
349 rats from following the movements of the waterspout, we introduced dummy moves: First the  
350 waterspout was doing a dummy move without giving water. One second later it did move to a new  
351 position where it let out a water drop. The third and last move was again a dummy move. Even for an  
352 experienced animal, this procedure resulted in multiple water drops distributed across the mesh at  
353 any given time point. The fact that the rats did not collect all water drops indicates that the animals  
354 could not predict where the water was let out and had to actively search for it. This task required  
355 minimal training as indicated by the stable paw velocities over all sessions. Thus, we used all sessions  
356 for data analysis (**Supplementary Fig. 1A**).

357 In the joystick task, the animals had to learn to grab a joystick-like manipulator as a first step. The  
358 manipulator was based on a manipulandum for rodents<sup>32</sup>. Instead of having to reach out for the  
359 joystick, the joystick was placed right below the right front paw. The naïve rats typically explored the  
360 arena in which the joystick was placed. As the animals placed the paw by chance on the joystick, the  
361 joystick vibrated and a liquid reward was given as long as three requirements were met: (1) The rats  
362 had to keep holding the joystick with the right front paw which we controlled for via force sensors on  
363 the joystick. (2) The left front paw had to be placed on a force sensor plate, which was placed to the  
364 left of the joystick. (3) The rats' head had to cross an infrared sensor. This ensured that the animals  
365 had to learn to use their right front paw to manipulate the joystick rather than the left paw or the  
366 mouth. The vibration of the joystick was implemented by clamping the current of the two motors  
367 according to two independent Gaussian processes and served two purposes: (1) it made the animals  
368 aware of the joystick. (2) The vibration of the joystick increased in amplitude during the course of 10 s  
369 (the maximum vibration amplitude resulted in an average acceleration of  $1.5\text{m/s}^2$ ) such that, unless  
370 the animals held the joystick firmly, it would lose the grip and thus not receive rewards. Together,  
371 these measures resulted in an automatic training by which the rats learned to hold the joystick during

372 the maximum vibration amplitude within 10 sessions. Once the rats had developed a firm grip of the  
373 joystick, the motors were turned off and the rats received a reward when they actively moved the  
374 joystick. Moreover, the rats only received rewards when they moved in a direction or to a position  
375 which had not been visited recently (see below). The joystick could be moved within an arena of 40x40  
376 mm. This arena was divided into 5x5 bins and the direction of movement was divided into 8 bins. For  
377 each bin we stored the amount of remaining reward. Whenever the rats visited one bin, the amount  
378 of remaining reward,  $r$ , in that bin was decreased to  $r - \Delta r$ . The amount of reward that was decreased,  
379  $\Delta r$ , was distributed among all other bins. Thus, if the rats preferred one bin, the reward within that bin  
380 disappeared completely after 20 seconds. It took up to 15 sessions for the animals to start to move the  
381 joystick non-repetitively (**Supplementary Fig. 1B**). Before the rats started to move randomly, they  
382 typically tried to pull the joystick only in one direction (typically towards the rat). This resulted in  
383 minimal overall movements since the joystick was stopped by the edges of the arena (the 40x40 mm  
384 arena). Only when they realized that they could move in all different directions, the amount of total  
385 movement increased. For data analyses, we used data from sessions 15 to 35.

386

### 387 **Quantifying behavior**

388 Since the rats had to take a defined pose in the joystick task, we could relate the joystick position and  
389 movement to the egocentric coordinates of the rat. To enable a comparison of the locomotor task and  
390 the joystick task, it was necessary to quantify the behavioral variables in a similar way. To achieve an  
391 egocentric tracking in the locomotor task, we tracked the paws, head, chest, and belly of the animals.  
392 By using the head, chest, and belly coordinates, we aligned the movements of the right front paw to  
393 egocentric coordinates. Those body parts were tracked by painting them in different colors. The head  
394 of the rat did not have to be painted because of the black hood of Long Evans rats. To ensure that all  
395 body parts could be tracked, the cameras were placed below the arena. Two to four cameras (Stingray,  
396 F033C IRF CSM, Allied Vision Technologies) were used in the locomotor task. The noise of tracking was

397 estimated to 0.79 cm/s (estimated when the paw was standing still on the mesh) and was subtracted  
398 from the paw velocity estimates.

399

#### 400 **Data acquisition and preprocessing of extracellular recordings**

401 Extracellular signals were bandpass filtered, amplified and digitized using the INTAN (Intan  
402 Technologies, Los Angeles, California) head stage attached to the Mill-Max matrix connector at the  
403 head of the animals. To maximize comfort for the animals, we stripped the ultrathin INTAN cable and  
404 suspended it with a 1.5 m long ultralight spring with a 1.5 mm diameter. The long recording cable  
405 allowed the rats to move between the locomotor task and the joystick task without having to be  
406 disconnected and re-connected. The rats could either begin with the locomotor task and after 30 min  
407 a door was opened allowing the rats to walk into the joystick arena for 40 to 90 minutes, or the rats  
408 were in the joystick arena for the entire session. In case of a dual task session, we always began with  
409 the locomotor task, because the color markers used for the locomotor tracking faded over time.

410 The extracellular recordings were sampled at 30 kHz and were de-noised offline. First, 50 Hz and the  
411 corresponding harmonics were removed using a 20 ms template estimation. The activity across all  
412 channels was demeaned using a median filter. Spike sorting was conducted on high-pass filtered data  
413 with a cut off frequency of 300 Hz. Spike snippets were extracted from peak aligned events that  
414 crossed a threshold of four times the standard deviation. Only spikes with a negative peak were taken  
415 into account. The spike window was -0.5 to 2 ms around the peak amplitude (resulting in 76 values for  
416 each spike). To minimize the risk that a sorted unit was a combination of multiple neurons, we applied  
417 a conservative threshold for the cluster size. To this end we used a cluster size that was dictated by the  
418 noise level half a millisecond before the minimum of the spike. Given the typical refractory period of  
419 neurons, this noise estimate excluded variability caused by this unit and was therefore a direct  
420 measure of the cluster size of this particular unit. Since our electrodes typically had a spacing between  
421 300 and 1000  $\mu\text{m}$ , we sorted each electrode separately. The spikes were sorted in the raw 76

422 dimensional space without dimensional reduction. For each sorted unit, the spike sorting algorithm  
423 had two phases. First, the algorithm estimated a suitable seed spike. Second, the corresponding  
424 waveform was optimized iteratively until the spike assignments of that unit remained constant. The  
425 clustering algorithm selected a seed spike by calculating the average noise level across all units.  
426 Afterwards, it randomly chose one spike and counted the number of neighboring spikes within this  
427 average noise level. Those spikes were called the spike-neighborhood. This procedure was repeated  
428 for 500 randomly chosen spikes in order to maximize the chance of finding a globally optimal seed  
429 spike. The spike that had most neighbors was selected as the seed for a unit. In order to optimize this  
430 spike seed, the noise level for the neighboring spikes was recalculated, the new neighborhood was  
431 calculated given this new noise level, and the new average waveform was calculated. This procedure  
432 was repeated until the neighborhood remained constant. The spikes within the noise-defined  
433 neighborhood were considered to belong to one sorted unit. For this unit, the spike sorting was  
434 finished at this point and it was not considered for further spike sorting. For the remaining spikes, the  
435 algorithm re-started phase one and two in order to search the next sorted unit. This procedure was  
436 stopped when it resulted in sorted units with spike rates lower than 0.1 Hz.

437 We regarded a unit as a single unit when the number of spikes within an inter-spike interval of less  
438 than 2 ms corresponded to a smaller firing rate than the average firing rate of the unit. To define the  
439 degree of decorrelation across neurons, we used the  $\mu$ -rate<sup>20</sup>. The  $\mu$ -rate denotes the minimum spike  
440 rate in the spike-triggered spike average between two neurons (cross correlogram). The cross  
441 correlogram was calculated over a period of -10 to 10 s with a 10 ms binning. We did not calculate the  
442  $\mu$ -rate from a neuron to itself since that would reflect intra-neuronal processing (adaptation and  
443 refractory period) rather than the decorrelation of the population. The  $\mu$ -rate corresponds to the  
444 average spike rate if the spikes of the two neurons occur independently of each other, and the  $\mu$ -rate  
445 would be 0 for the case of a lag with no corresponding spike pairs. The  $\mu$ -rate percentage was  
446 calculated by dividing the  $\mu$ -rate with the average firing rate.

#### 447 **Single and multiunit velocity modulation**

448 As a general way to relate behavior to neural activity on a single unit or multiunit level, we used a  
449 generalized form of spike triggered average of the paw velocity, which we denote as activity weighted  
450 distribution (AWD). First, instead of taking discrete spikes, we weighted the behavioral variable (paw  
451 velocity or position) with a continuous neuronal activity. Here this continuous activity was the  
452 instantaneous firing rate smoothed with a Gaussian kernel with a standard deviation of 50 ms. Second,  
453 instead of averaging the behavioral variable, we calculated the distribution for the behavioral variable.  
454 A distribution was formed by binning the complete velocity range into 10 equally sized bins. Each bin  
455 quantified the average activity across the velocity range of the corresponding bin. In contrast to the  
456 linear average in the classical spike triggered average, the distribution of the behavioral variable  
457 allowed us to take nonlinearities into account, e.g. exponentially increasing firing rates with linearly  
458 increasing velocity. According to a traditional spike-triggered average, the relation between neuronal  
459 activity and behavior was calculated at different temporal lags between neural activity and behavior.  
460 Here we used lags between -4 and 4 s with a temporal resolution of 10 ms. For large delays beyond  
461 3 s, the neuron was typically no longer modulated by behavior. Here we used the average activity  
462 between 3 and 4 s to calculate a baseline activity. This baseline activity was subtracted from the AWD.  
463 The average velocity modulation at each lag was calculated by taking the mean of the absolute value  
464 of the subtracted AWD (**Fig. 1F and G**). The duration and the lag of the modulation was calculated by  
465 first extracting the peak modulation. Then we traced this modulation backward and forward in time  
466 until the modulation was less than 80% of the peak modulation. The temporal difference between  
467 those two time points was defined as the duration of the modulation (**Fig. 1H, 1I, 2B, 2C, and 2D**). The  
468 average between those time points was denoted as the temporal lag of the modulation. We took the  
469 average time of the 80% start and stop time since this resulted in a more accurate estimation than the  
470 peak time. This was due to the frequent occurrence of plateaus in the velocity modulation. During  
471 these plateaus, small fluctuation of the neuronal signal within the noise level can make the peak appear  
472 at any time point along the plateau. To determine if a unit was modulated by velocity, we calculated  
473 the mean and standard deviation of the velocity modulation at the two extreme lags of the normalized

474 velocity modulation (-4 to -3 s and 3 to 4 s). The normalized velocity modulation was calculated by  
475 subtracting and dividing the velocity modulation with the mean and standard deviation, respectively.  
476 A unit was regarded as modulated if this velocity modulation was larger than 10 (a.u.).

477

#### 478 **Bootstrapping velocity modulation**

479 To estimate the variability of the modulation duration we used a bootstrap analysis (**Fig. 1H and I**).  
480 Since it would be computationally inefficient to sample from all 10 ms bins with replacement and since  
481 2 neighboring 10 ms bins were not independent, we chose to divide each session into 100 segments  
482 of equal size and to calculate the AWD for each such segment. This resulted in segments that were at  
483 least 10 seconds long, allowing computationally effective bootstrap sampling. We sampled the  
484 corresponding 100 AWDs with replacement and calculated the resulting velocity modulation. This  
485 procedure was repeated 100 times. For each repetition, we calculated the modulation duration.  
486 Afterwards, we calculated the standard deviation across those repetitions.

487

#### 488 **Population correlation analysis and trial definition**

489 The population correlation analysis was performed on normalized neural activity. For each unit, we  
490 divided the spike trains into 10 ms bins, subtracted the average firing rate and divided each bin by the  
491 standard deviation of the binned activity. This normalized data was organized into a matrix with as  
492 many rows as there were units and as many columns as there were time bins. To prepare the data for  
493 the correlation, we normalized each column to have an average of 0 and a Cartesian norm of 1 (unit  
494 length). Finally, we removed a global population activity that could otherwise bias the correlation  
495 analysis. During short periods of time (between 500 ms to 10 s) sometimes the animals suddenly froze  
496 (both in the joystick and the locomotor task) which resulted in a correlated population activity across  
497 the joystick and the locomotor task (average  $R=0.5$ ). Since this activity was correlated across two  
498 fundamentally different tasks, it was more likely to reflect a global state change rather than a planning

499 process, which in turn could bias the population correlation. Therefore, we minimized the contribution  
500 of this freezing related population activity,  $p$ , by correlating the population activity at each time bin,  
501  $a_t$ , with the population activity, and subtracting the population activity according to this correlation:  $a_t$   
502  $- p(a_t * p)$ , where  $*$  is the scalar product.

503 With this normalized activity, we calculated the scalar product (Pearson correlation coefficient)  
504 between two population vectors at 2 different time points (**Fig. 3C and D**). We only correlated  
505 population vectors within a trial. Since our behavioral data was not separated into defined trials, we  
506 constructed trials using the paw velocity. First, we filtered the paw velocity with a Gaussian kernel of  
507 2 s full width half maximum (FWHM). To find trials for which a period of low behavioral activity was  
508 followed by a period of high behavioral activity, we divided each time point in the filtered velocity by  
509 each time point in the filtered velocity 2 s earlier. If this ratio was larger than 2 and if this ratio was a  
510 local maximum across time, this was regarded as the central time point of a trial. A trial was then  
511 defined as 8 s before and 8 s after this maximum. This resulted in 1601 bins of 10 ms in one trial. The  
512 correlation was calculated between all 1601×1601 pairs of time points within a trial. Finally, as the  
513 population vector at one reference time point was correlated with the population vector at all other  
514 time points, the correlation would decay with increasing distances from the reference time point. This  
515 decay was fitted by an exponential function using nonlinear optimization with a Gaussian cost function  
516 (**Fig. 3E, F, G and H**).

517

### 518 **Behavioral impact on population correlation**

519 To test how well the neurons encoded for position (**Fig. S2B**), we divided the egocentric x and y  
520 movement coordinates of the right paw into five equally sized bins between the minimum and  
521 maximum position value. This resulted in a 5 x 5 element matrix. For each element in this matrix we  
522 calculated the average firing rate of the neuron when the paw was in the corresponding position within  
523  $\pm 50$  ms. We used this matrix as a lookup table to estimate the instantaneous firing rate at each 100 ms



524 time bin, given the position at the corresponding time bin. The resulting time course of the firing rate  
525 was correlated to the time course of the true instantaneous firing rate binned in 100 ms bins. The same  
526 analysis sequence was conducted for x and y velocity.

527

## 528 **Subthreshold reconstruction**

529 The subthreshold reconstruction algorithm, SubLab, has been described in detail elsewhere<sup>20</sup>. In short,  
530 the algorithm uses the spikes of one unit (target unit) to reconstruct its subthreshold activity by means  
531 of the spiking activity of the remaining units (input units). The algorithm differs from recent auto-  
532 encoders and dimension reduction techniques in three aspects: (1) it does not assume an even  
533 distribution of spikes in time (Poissonian or Gaussian models); (2) (subthreshold) activity is not  
534 modified, as long as it does not cross the threshold; (3) the algorithm reconstructs the subthreshold  
535 activity individually per neuron and, therefore, does not impose any relation between units. Here we  
536 used 10 training epochs and we ran the reconstruction on complete sessions.

537 We also tested the LFADS auto-encoder algorithm, since it does not require a trial structure and since  
538 it can fit complex dynamics to spiking data. For our data, LFADS smoothed the spike trains in a  
539 piecewise continuous way. We observed gaps in the smoothed spike trains. We suspect that these  
540 gaps were due to the spontaneous and complex behaviors, which in turn caused the internal states to  
541 be reset frequently.

542 The reconstructed activity was filtered in the following way (**Fig. 4C, D, E and F**). High pass filtering:  
543 First, the reconstructed signal was smoothed with a Gaussian kernel with a standard deviation ( $\sigma$ ) of  
544 0.14 s. Using the cut-off frequency formula for Gaussian filtering  $(2\pi\sigma)^{-1}$ , this corresponds to a cut off  
545 frequency of 1.1 Hz. Second, we subtracted this smoothed signal from the original reconstructed  
546 signal. Band-pass filtering: First, the reconstructed signal was smoothed with a Gaussian kernel with a  
547 standard deviation of 0.057, 0.14, 0.28, 0.57, 1.4, 2.8, and 5.7 s (2.8, 1.1, 0.57, 0.28, 0.057, and 0.028  
548 Hz), respectively. Second, we subtracted this smoothed signal from the original reconstructed signal.  
549 Third, the resulting signal was smoothed with a Gaussian kernel with a standard deviation of 0.014,  
550 0.035, 0.071, 0.14, 0.35, 0.71, and 1.4 s (11, 4.5, 2.2, 1.1, 0.45, 0.22, and 0.11 Hz), respectively. Low  
551 pass filtering: The band-pass filtered signal that was filtered with a low-pass kernel of 0.71 seconds  
552 (0.22 Hz) and high-pass kernel of 2.8 seconds (0.057 Hz) was referred to as the low-pass filtered signal.

553 The additional high pass filtering minimizes the influence from strong low frequency components.  
554 Finally, to get the energy of the filtered signal, we calculated the absolute value of the high-pass filtered  
555 signal.

556

## 557 **Statistical procedures**

558 All statistics and graphical illustrations of spiking unit data have been corrected for the possibility that  
559 the same unit has been recorded during multiple consecutive days (**Supplementary Table 3**). In motor  
560 cortex, evidence has been provided that tungsten electrodes are able to record the same unit for an  
561 average of three days<sup>33</sup>. Since a considerable amount (11%) of neurons could be recorded for up to a  
562 week, we regarded every 7<sup>th</sup> unit to be an independent data sample. To this end, the degrees of  
563 freedom were calculated on the basis of the unit count divided by 7. We made this correction for the  
564 t-test, the Pearson correlation coefficient, and the ANOVA. For box plots (using Matlab's boxplot  
565 function), we plotted the bootstrapped data (using Matlab's bootstrap function with 1000 iterations)  
566 and adjusted the standard deviation of the bootstrapped data such that it was  $\sqrt{7}$  times that of the  
567 original data.

568 For statistical testing, we assumed that the data was normally distributed. The test statistics for the  
569 Pearson correlation coefficient, the ANOVA and unpaired statistics approached a normal distribution  
570 for large data samples. For the paired t-test, we assumed a normal distribution as the test distribution  
571 was symmetric around 0. Unless otherwise stated, samples were described as mean and standard  
572 deviation of the mean.

573 Since we had one less animal in the joystick task (animal 220 lost the implant before it learned the  
574 joystick task), all paired tests were done without animal 220 in both the joystick and locomotor task.  
575 The non-paired tests were done using all 6 animals in the locomotor task and all 5 animals in the  
576 joystick task.

577

578 **Acknowledgements**

579 We would like to thank Philippe Coulon for comments on earlier versions of the manuscript. This work  
580 was supported by the Bernstein Award 2012 (01GQ2301), the cluster of excellence BrainLinks-Brain-  
581 Tools (EXC 1086), the Deutsche Forschungsgemeinschaft (DFG) via the grants DI 1908/3-1 and 1908/6-  
582 1, as well as the ERC Starting Grant OptoMotorPath (338041), all to I.D. The authors acknowledge  
583 support by the state of Baden-Württemberg through bwHPC and the German Research Foundation  
584 (DFG) through grant no INST 39/963-1 FUGG (bwForCluster NEMO).

585

586 **Declaration of Interests**

587 The authors declare no competing interests.

588

589 **Author contributions**

590 D.E. and I.D. conceived and designed the experiments and wrote the manuscript. D.E., M.H., and A.S.  
591 performed the experiments.

592

593 **Data Availability**

594 The data that support the findings of this study are available from the corresponding authors upon  
595 reasonable request.

596

597 **Additional Information**

598 Supplementary Information is available for this paper.

599 Correspondence and requests for materials should be addressed to [ilka.diester@biologie.uni-  
600 freiburg.de](mailto:ilka.diester@biologie.uni-<br/>600 freiburg.de) or [david.eriksson@biologie.uni-freiburg.de](mailto:david.eriksson@biologie.uni-freiburg.de).

601

602

603

604

605 **References**

- 606 1. Estebanez, L., Hoffmann, D., Voigt, B. C. & Poulet, J. F. A. Parvalbumin-Expressing GABAergic  
607 Neurons in Primary Motor Cortex Signal Reaching. *Cell Rep.* **20**, 308–318 (2017).
- 608 2. Economo, M. N. *et al.* Distinct descending motor cortex pathways and their roles in movement.  
609 *Nature* **563**, 79–84 (2018).
- 610 3. Kaufman, M. T., Churchland, M. M., Ryu, S. I. & Shenoy, K. V. Cortical activity in the null space:  
611 permitting preparation without movement. *Nat. Neurosci.* **17**, 440–448 (2014).
- 612 4. Churchland, M. M. *et al.* Neural population dynamics during reaching. *Nature* **487**, 51–56 (2012).
- 613 5. Gao, Z. *et al.* A cortico-cerebellar loop for motor planning. *Nature* **563**, 113–116 (2018).
- 614 6. Elsayed, G. F., Lara, A. H., Kaufman, M. T., Churchland, M. M. & Cunningham, J. P. Reorganization  
615 between preparatory and movement population responses in motor cortex. *Nat. Commun.* **7**,  
616 13239 (2016).
- 617 7. Li, N., Chen, T.-W., Guo, Z. V., Gerfen, C. R. & Svoboda, K. A motor cortex circuit for motor  
618 planning and movement. *Nature* **519**, 51–56 (2015).
- 619 8. Cheney, P. D. & Fetz, E. E. Functional classes of primate corticomotoneuronal cells and their  
620 relation to active force. *J. Neurophysiol.* **44**, 773–791 (1980).
- 621 9. Porter, R. & Lemon, R. *Corticospinal function and voluntary movement.* (Clarendon Press, 1993).
- 622 10. Porter, R. & Sanderson, J. H. Antidromic cortical response to pyramidal-tract stimulation in the  
623 rat. *J. Physiol.* **170**, 355–370 (1964).
- 624 11. Ohta, M. & Tashiro, N. Pyrimidal tract response to cortical stimulation in the rat. *Jpn. J. Physiol.*  
625 **18**, 432–445 (1968).
- 626 12. Kawai, R. *et al.* Motor cortex is required for learning but not for executing a motor skill. *Neuron*  
627 **86**, 800–812 (2015).
- 628 13. Whishaw, I. Q., O'Connor, W. T. & Dunnett, S. B. The contributions of motor cortex, nigrostriatal  
629 dopamine and caudate-putamen to skilled forelimb use in the rat. *Brain J. Neurol.* **109**, 805–843  
630 (1986).

- 631 14. Guo, J.-Z. *et al.* Cortex commands the performance of skilled movement. *eLife* **4**, e10774 (2015).
- 632 15. Ueno, M. & Yamashita, T. Kinematic analyses reveal impaired locomotion following injury of the  
633 motor cortex in mice. *Exp. Neurol.* **230**, 280–290 (2011).
- 634 16. Rajan, K., Harvey, C. D. & Tank, D. W. Recurrent Network Models of Sequence Generation and  
635 Memory. *Neuron* **90**, 128–142 (2016).
- 636 17. Tully, P. J., Lindén, H., Hennig, M. H. & Lansner, A. Spike-Based Bayesian-Hebbian Learning of  
637 Temporal Sequences. *PLoS Comput. Biol.* **12**, e1004954 (2016).
- 638 18. Uylings, H. B. M., Groenewegen, H. J. & Kolb, B. Do rats have a prefrontal cortex? *Behav. Brain*  
639 *Res.* **146**, 3–17 (2003).
- 640 19. Murray, E. A., Bussey, T. J. & Wise, S. P. Role of prefrontal cortex in a network for arbitrary  
641 visuomotor mapping. *Exp. Brain Res.* **133**, 114–129 (2000).
- 642 20. Papaioannou, S., Smith, A. M. & Eriksson, D. Reconstruction of in-vivo subthreshold activity of  
643 single neurons from large-scale spiking recordings. *bioRxiv* 673046 (2019) doi:10.1101/673046.
- 644 21. Hantman, A. W. & Jessell, T. M. Clarke’s column neurons as the focus of a corticospinal corollary  
645 circuit. *Nat. Neurosci.* **13**, 1233–1239 (2010).
- 646 22. Baldissera, F., Gustafsson, B. & Parmiggiani, F. Saturating summation of the  
647 afterhyperpolarization conductance in spinal motoneurons: a mechanism for ‘secondary range’  
648 repetitive firing. *Brain Res.* **146**, 69–82 (1978).
- 649 23. Zucker, R. S. & Regehr, W. G. Short-term synaptic plasticity. *Annu. Rev. Physiol.* **64**, 355–405  
650 (2002).
- 651 24. Silberberg, G. & Markram, H. Disynaptic inhibition between neocortical pyramidal cells mediated  
652 by Martinotti cells. *Neuron* **53**, 735–746 (2007).
- 653 25. Coulon, P. & Landisman, C. E. The Potential Role of Gap Junctional Plasticity in the Regulation of  
654 State. *Neuron* **93**, 1275–1295 (2017).
- 655 26. Bianchi, D. *et al.* On the mechanisms underlying the depolarization block in the spiking dynamics  
656 of CA1 pyramidal neurons. *J. Comput. Neurosci.* **33**, 207–225 (2012).

- 657 27. Ames, K. C., Ryu, S. I. & Shenoy, K. V. Simultaneous motor preparation and execution in a last-  
658 moment reach correction task. *Nat. Commun.* **10**, 2718 (2019).
- 659 28. Hanks, T. D. *et al.* Distinct relationships of parietal and prefrontal cortices to evidence  
660 accumulation. *Nature* **520**, 220–223 (2015).
- 661 29. Morcos, A. S. & Harvey, C. D. History-dependent variability in population dynamics during  
662 evidence accumulation in cortex. *Nat. Neurosci.* **19**, 1672–1681 (2016).
- 663 30. Andersen, R. A. & Cui, H. Intention, action planning, and decision making in parietal-frontal  
664 circuits. *Neuron* **63**, 568–583 (2009).
- 665 31. George Paxinos & Charles Watson. The Rat Brain in Stereotaxic Coordinates - 6th Edition.  
666 [https://www.elsevier.com/books/the-rat-brain-in-stereotaxic-coordinates/paxinos/978-0-12-](https://www.elsevier.com/books/the-rat-brain-in-stereotaxic-coordinates/paxinos/978-0-12-374121-9)  
667 [374121-9](https://www.elsevier.com/books/the-rat-brain-in-stereotaxic-coordinates/paxinos/978-0-12-374121-9).
- 668 32. Vigar, B. *et al.* A small-scale robotic manipulandum for motor training in stroke rats. *IEEE Int.*  
669 *Conf. Rehabil. Robot. Proc.* **2011**, 5975349 (2011).
- 670 33. Dhawale, A. K. *et al.* Automated long-term recording and analysis of neural activity in behaving  
671 animals. *eLife* **6**, (2017).
- 672
