# Supplementary material for: Cortical activity at different time scales: high-pass filtering separates motor planning and execution
Source: bioRxiv or medRxiv preprint supplement (doi:10.1101/857300), 2020-06-06
Supplement: Supplementary file [file media-1.pdf]

## 1 Supplementary Information

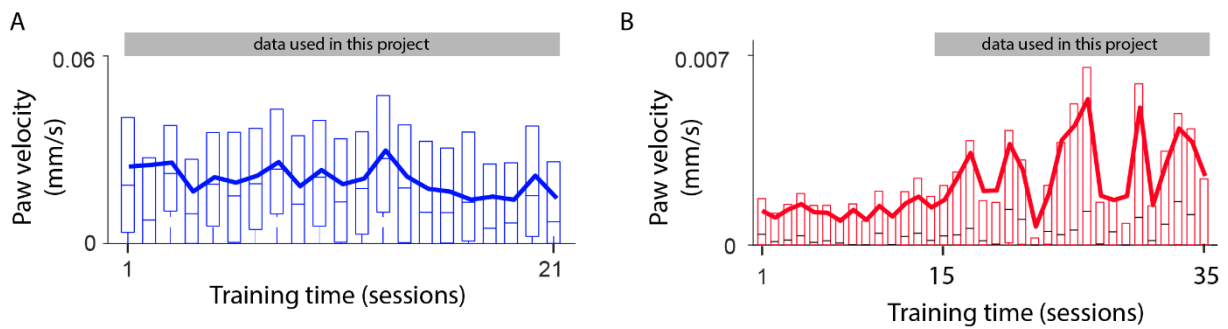

2  
3 **Supplementary Figure 1.** Development of the paw velocities across recording sessions. A: Paw velocity  
4 for the locomotor task. Outliers and upper whisker artefacts have been removed from the box-plot to  
5 improve visibility. The solid line is the average paw velocity. The gray bar on the top indicates which  
6 data has been used for this project. B: Same outline as in A but for the joystick task. The paw velocity  
7 changed at session 15. Thus, data was used only after 15 training sessions.

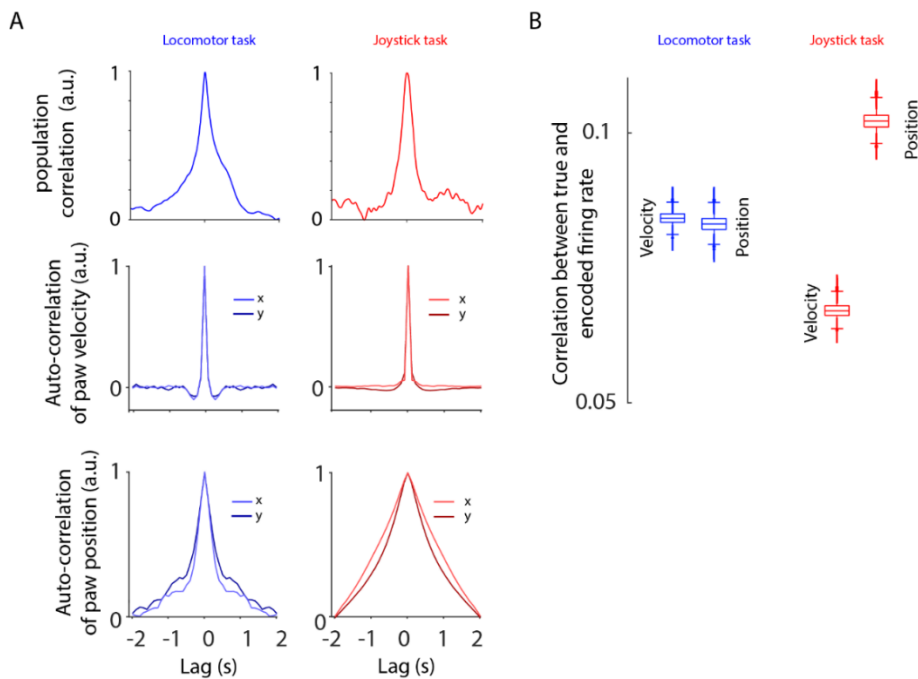

8  
9 **Supplementary Figure 3.** Ruling out a putative behavioral impact on population correlations.  
10 A: Population activity correlation for the locomotor task and the joystick task (top row).  
11 Autocorrelation of the paw velocity for the locomotor task and the joystick task (second row), and of  
12 the paw position for the locomotor task and the joystick task (bottom row). B: Encoding performance  
13 using only position or direction of the right paw.

14 **Supplementary Table 1**

| Animal | SU<br>mod | SU<br>all | MU<br>mod | MU<br>all | SU+MU<br>mod | SU+MU<br>all | Session<br>count |
|--------|-----------|-----------|-----------|-----------|--------------|--------------|------------------|
| 148    | 162       | 565       | 463       | 852       | 625          | 1417         | 15               |
| 220    | 199       | 493       | 410       | 706       | 609          | 1199         | 11               |
| 221    | 86        | 519       | 337       | 858       | 423          | 1377         | 16               |
| 222    | 367       | 1321      | 679       | 1566      | 1046         | 2887         | 21               |
| 223    | 706       | 1816      | 893       | 1708      | 1599         | 3524         | 20               |
| 224    | 212       | 686       | 589       | 1186      | 801          | 1872         | 17               |
| Sum    | 1733      | 5400      | 3371      | 6876      | 5103         | 12276        | 100              |

15 Counts of neuronal units recorded during the locomotor task. mod - modulated units.

16

17 **Supplementary Table 2**

| Animal | SU<br>mod | SU<br>all | MU<br>mod | MU<br>all | SU+MU<br>mod | SU+MU<br>all | Session<br>count |
|--------|-----------|-----------|-----------|-----------|--------------|--------------|------------------|
| 148    | 30        | 217       | 73        | 266       | 103          | 483          | 5                |
| 220    | 0         | 0         | 0         | 0         | 0            | 0            | 0                |
| 221    | 9         | 161       | 53        | 253       | 62           | 414          | 5                |
| 222    | 72        | 344       | 238       | 536       | 310          | 880          | 7                |
| 223    | 63        | 324       | 175       | 349       | 238          | 673          | 4                |
| 224    | 28        | 171       | 98        | 255       | 126          | 426          | 4                |
| Sum    | 202       | 1217      | 637       | 1659      | 839          | 2876         | 25               |

18 Counts of neuronal units recorded during the joystick task. mod - modulated units.

19

20 **Supplementary Table 3**

| <b>Fig.</b>     | <b>Groups:</b><br>a refers to animal count,<br>u refers to sorted unit count,<br>u <sub>c</sub> = u/7 refers to corrected unit count used for significance                                 | <b>Statistical Analysis</b>                                                                                                                                                                                                                                                                |
|-----------------|--------------------------------------------------------------------------------------------------------------------------------------------------------------------------------------------|--------------------------------------------------------------------------------------------------------------------------------------------------------------------------------------------------------------------------------------------------------------------------------------------|
| Fig. 1l         | Locomotor task, Motor-Sensory, (u = 5103, u <sub>c</sub> =729)<br>Joystick task, Motor-Sensory, (u = 839, u <sub>c</sub> = 120)                                                            | Two-tailed paired t-test, $P < 0.0001$<br>Two-tailed paired t-test, $P < 0.0001$                                                                                                                                                                                                           |
| Fig. 2d         | Locomotor task, Absolute lag, (u = 5137, u <sub>c</sub> =729)<br>Locomotor task, Duration (6 bins), (u = 5137, u <sub>c</sub> =729)                                                        | RM One-Way ANOVA, $F(5, 723) = 474, P < 0.0001$                                                                                                                                                                                                                                            |
| Fig. 2d         | Joystick task, Absolute lag, (u = 839, u <sub>c</sub> = 120)<br>Joystick task, Duration (6 bins), (u = 839, u <sub>c</sub> = 120)                                                          | RM One-Way ANOVA, $F(5, 114) = 72, P < 0.0001$                                                                                                                                                                                                                                             |
| Fig. 2d (left)  | Locomotor task, S1 Duration, (u = 1651, u <sub>c</sub> =236)<br>Locomotor task, M1 Duration, (u = 2316, u <sub>c</sub> =331)<br>Locomotor task, M2 Duration, (u=1136, u <sub>c</sub> =163) | RM One-Way ANOVA, $F(2, 726) = 171, P < 0.0001$<br>Post Hoc: 3-way Bonferroni:<br>S1-M1: $p=0.0021$<br>M1-M2: $p=0.024$<br>S1-M2: $p<0.0001$                                                                                                                                               |
| Fig. 2d (right) | Joystick task, S1 Duration, (u = 252, u <sub>c</sub> =36)<br>Joystick task, M1 Duration, (u = 323, u <sub>c</sub> =46)<br>Joystick task, M2 Duration, (u= 264, u <sub>c</sub> =38)         | RM One-Way ANOVA $F(2, 117) = 16, P < 0.0001$<br>Post Hoc: 3 way Bonferroni:<br>S1-M1: $p<0.0001$<br>M1-M2: $p<0.0001$<br>S1-M2: $p<0.0001$                                                                                                                                                |
| Fig. 3f         | Locomotor task, Relative time constant, (a = 6)<br>Joystick task, Relative time constant (a = 5)                                                                                           | Two-tailed t-test, $P = 0.20$<br>Two-tailed t-test, $P = 0.043$                                                                                                                                                                                                                            |
| Fig. 3h         | Locomotor task, Absolute time constant, (a = 6)<br>Joystick task, Absolute time constant (a = 5)                                                                                           | RM One-Way ANOVA, $F(3, 18) = 6.6, P = 0.0033$<br>Post Hoc: 6-way Bonferroni:<br>Lowest paw velocity in the Joystick task vs Highest paw velocity in the Locomotor task: $p = 0.037$<br>Lowest paw velocity in the Joystick task vs Highest paw velocity in the Joystick task: $p = 0.004$ |
| Fig. 4d         | Locomotor task, low-pass versus high-pass, Pearson correlation, (a = 6)<br>Joystick task, low-pass versus high-pass, Pearson correlation, (a = 5)                                          | Two-tailed t-test, $P = 0.016$<br>Two-tailed t-test, $P = 0.0091$                                                                                                                                                                                                                          |
| Fig. 4d         | Locomotor task, high-pass, Lag, (a = 6)<br>Joystick task, high-pass, Lag, (a = 5)                                                                                                          | Two-tailed t-test, $P = 0.33$<br>Two-tailed t-test, $P = 0.01$                                                                                                                                                                                                                             |
| Fig. 4d         | Locomotor task, low-pass, Lag, (a = 6)<br>Joystick task, low-pass, Lag, (a = 5)                                                                                                            | Two-tailed t-test, $P = 0.0013$<br>Two-tailed t-test, $P = 0.0029$                                                                                                                                                                                                                         |
| Fig. 4e         | Locomotor task, Pearson correlation, (a = 6)                                                                                                                                               | RM One-Way ANOVA $F(6, 35) = 3.6, P = 0.007$<br>Post Hoc: 21-way Bonferroni:<br>5 Hz vs 1 Hz: $p = 0.04$                                                                                                                                                                                   |
| Fig. 4e         | Joystick task, Pearson correlation, (a = 6)                                                                                                                                                | RM One-Way ANOVA $F(6, 28) = 3.5, P = 0.01$                                                                                                                                                                                                                                                |

|         |                                  |                                                                                                                                                                                                                                                 |
|---------|----------------------------------|-------------------------------------------------------------------------------------------------------------------------------------------------------------------------------------------------------------------------------------------------|
|         |                                  | Post Hoc: 21-way Bonferroni:<br>10 Hz vs 0.5 Hz: $p = 0.034$<br>5 Hz vs 0.5 Hz: $p = 0.034$                                                                                                                                                     |
| Fig. 4f | Locomotor task, Lag, ( $a = 6$ ) | RM One-Way ANOVA $F(6, 35) = 5.8, P = 0.0002$<br>Post Hoc: 21-way Bonferroni:<br>50 Hz vs 0.5 Hz: $p = 0.0021$<br>20 Hz vs 0.5 Hz: $p = 0.042$<br>10 Hz vs 0.5 Hz: $p = 0.0017$<br>5 Hz vs 0.5 Hz: $p = 0.0089$<br>2 Hz vs 0.5 Hz: $p = 0.0009$ |
| Fig. 4f | Joystick task, Lag, ( $a = 6$ )  | RM One-Way ANOVA $F(6, 28) = 2.5, P = 0.045$<br>Post Hoc: 21-way Bonferroni:<br>10 Hz vs 0.5 Hz: $p = 0.045$                                                                                                                                    |

21

22 **Supplementary Note 1:** *The difference in stability of population activity cannot be explained by*  
23 *behavioral differences across the two tasks*

24 Could the differences in stability of the population activity be explained by differences in behavior  
25 across the two tasks? To address this question, we tested whether the autocorrelation of two easily  
26 accessible behavioral parameters can explain the observed effects: (1) paw velocity and (2) egocentric  
27 paw position. As the population correlation decayed more slowly in the locomotor task, we would  
28 expect a temporally broader behavioral autocorrelation for the locomotor task compared to the  
29 joystick task. However, the similarly narrow peaks of the autocorrelation of the paw velocity in both  
30 tasks argue that the difference in the stability of the population activity (**Supplementary Fig. 3A, upper**  
31 **panel row**) cannot be explained by differences in paw velocity (**Supplementary Fig. 3A, middle panel**  
32 **row**). Similarly, for the paw position, we would expect a temporally broader behavioral autocorrelation  
33 for the locomotor task compared to the joystick task to explain the stability differences of the  
34 population activity. Instead, the autocorrelation of the paw position was narrower during the  
35 locomotor task than during the joystick task (**Supplementary Fig. 3A, lower panel row**). Thus, neither  
36 the velocity autocorrelation, nor the position autocorrelation, could explain the differences in  
37 population activity stability. Alternatively, neurons preferentially encode the position during the  
38 locomotor task, and the velocity during the joystick task. If this were true, the broad population

39 correlation during locomotion could be explained by the broad position autocorrelation and the  
40 narrow population correlation during the joystick task could be explained by the narrow velocity  
41 autocorrelation. To this end we tested the encoding preference (position or velocity) of the neurons in  
42 the two tasks. The neurons showed an encoding preference for position in the joystick task  
43 **(Supplementary Fig. 3B)**, which stands in contrast to the more precise auto-correlation for paw  
44 velocities in the joystick task. These opposing results suggest that differences in the stability of  
45 population activity cannot be explained by a differential encoding preference of position and velocity.  
46 To summarize, there is a strong decorrelation during paw movements in the joystick task, which cannot  
47 be explained by means of differences in behavioral statistics.

48

#### 49 **Supplementary Note 2:** *Adaptation mechanisms and compatibility with prolonged movements*

50 Adaptation mechanisms at any stage between the cortex and the muscles could serve as the biological  
51 equivalent of a high pass filter. The high pass filter should detect fast changes in the activity. On the  
52 level of neuronal spiking this can be a change from a high firing rate to a low firing rate, or vice versa.  
53 On the level of summed synaptic input this can be the change from a large input current or a low input  
54 current, or vice versa. There are numerous neuronal phenomena that describe high-pass filtering on  
55 the time scale of hundreds of milliseconds, such as spike rate adaptation<sup>1</sup>, short term synaptic  
56 depression<sup>2</sup>, integrating inhibitory neurons<sup>3</sup>, low-pass filtering across gap junction connected  
57 interneurons<sup>4</sup>, and depolarization block<sup>5</sup>. The underlying mechanisms of those phenomena can follow  
58 the slowly evolving motor planning and sensory integration activity by means of the intracellular  
59 calcium concentration, amount of release ready vesicles in the presynaptic terminal, the firing rate of  
60 integrating inhibitory neurons, or the number of inactivated sodium channels, respectively.

61 The generation of prolonged movements under the control of an adaptation related high pass  
62 mechanism would require a subcortical process that can be triggered by short lasting inputs. In the  
63 lamprey, the reticulospinal cells transform a short duration sensory input into a long-lasting excitatory

64 command<sup>6</sup>. In the zebrafish, high frequency stimulation in the brain stem initiates sustained locomotor  
65 behavior<sup>7</sup>. Similarly, in the basal ganglia of rodents, neurons are activated during the initiation and  
66 termination of movement sequences<sup>8</sup>. In the mouse, the lower pyramidal tract neurons have been  
67 shown to have a preference for motor execution<sup>9</sup> and are thus good candidates for contributing to  
68 sustaining movements. These neuronal processes in combination with our proposed high pass filtering  
69 mechanisms would allow for movements of different durations.

70

71

72 **References**

- 73 1. Baldissera, F., Gustafsson, B. & Parmiggiani, F. Saturating summation of the  
74 afterhyperpolarization conductance in spinal motoneurons: a mechanism for 'secondary range'  
75 repetitive firing. *Brain Res.* **146**, 69–82 (1978).
- 76 2. Zucker, R. S. & Regehr, W. G. Short-term synaptic plasticity. *Annu. Rev. Physiol.* **64**, 355–405  
77 (2002).
- 78 3. Silberberg, G. & Markram, H. Disynaptic inhibition between neocortical pyramidal cells mediated  
79 by Martinotti cells. *Neuron* **53**, 735–746 (2007).
- 80 4. Coulon, P. & Landisman, C. E. The Potential Role of Gap Junctional Plasticity in the Regulation of  
81 State. *Neuron* **93**, 1275–1295 (2017).
- 82 5. Bianchi, D. *et al.* On the mechanisms underlying the depolarization block in the spiking dynamics  
83 of CA1 pyramidal neurons. *J. Comput. Neurosci.* **33**, 207–225 (2012).
- 84 6. Dubuc, R. *et al.* Initiation of locomotion in lampreys. *Brain Res. Rev.* **57**, 172–182 (2008).
- 85 7. Kyriakatos, A. *et al.* Initiation of locomotion in adult zebrafish. *J. Neurosci. Off. J. Soc. Neurosci.*  
86 **31**, 8422–8431 (2011).
- 87 8. Jin, X. & Costa, R. M. Shaping Action Sequences in Basal Ganglia Circuits. *Curr. Opin. Neurobiol.*  
88 **33**, 188–196 (2015).
- 89 9. Economo, M. N. *et al.* Distinct descending motor cortex pathways and their roles in movement.  
90 *Nature* **563**, 79–84 (2018).

91
